# Supplementary material
Source: MDPI journal article supplement (https://www.mdpi.com/1999-4907/13/11/1934)
Supplement: s1 [file s1]

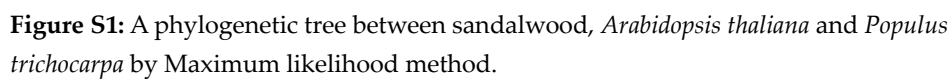

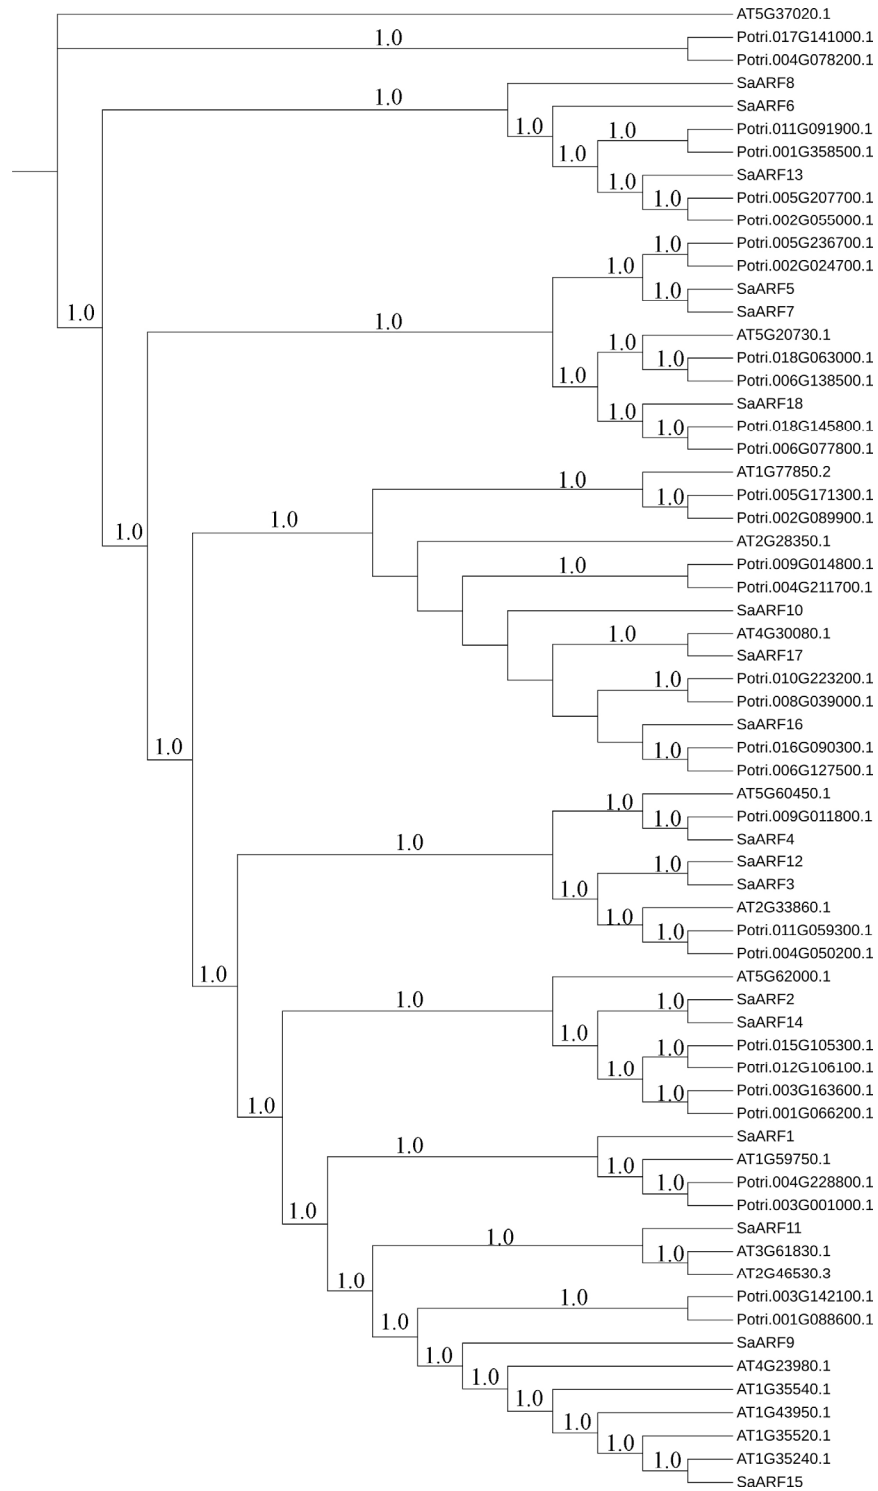

**Figure S2:** A phylogenetic tree between sandalwood, *Arabidopsis thaliana* and *Populus trichocarpa* by Maximum parsimony method.
